# Supplementary material for: Solvent optimization for bacterial extracellular matrices: a solution for the insoluble
Source: Royal Society of Chemistry journal article supplement (doi:10.1039/c4ra10930a), 2014-12-19
Supplement: c4ra10930a1.pdf [file c4ra10930a1.pdf]

## Supporting Information

### Solvent optimization for bacterial extracellular matrices: a solution for the insoluble

Thomas Seviour<sup>1,\*</sup>, Piyarat Weerachanchai<sup>2,3</sup>, Jamie Hinks<sup>1</sup>, Dan Roizman<sup>1</sup>, Scott A. Rice<sup>1,4</sup>, Linlu Bai<sup>3</sup>, Jong-Min Lee<sup>3,\*</sup>, Staffan Kjelleberg<sup>1,5</sup>

<sup>1</sup> Singapore Centre on Environmental Life Sciences Engineering (SCELSE), Nanyang Technological University, SBS-01N-27, Singapore 637551. Email: [twseviour@ntu.edu.sg](mailto:twseviour@ntu.edu.sg); Fax: +65 6515-6751; Tel: +65 6592-7902.

<sup>2</sup> Nanyang Environment and Water Research Institute (NEWRI), Nanyang Technological University, Singapore.

<sup>3</sup> School of Chemical and Biomedical Engineering, Nanyang Technological University, Singapore 637459. Email: [jmlee@ntu.edu.sg](mailto:jmlee@ntu.edu.sg); Fax: +65 6794-7553; Tel: +65 6513-8129.

<sup>4</sup> School of Biological Sciences (SBS), Nanyang Technological University, Singapore 637551.

<sup>5</sup> Centre for Marine BioInnovation and School of Biotechnology and Biomolecular Sciences, University of New South Wales, Sydney, NSW, 2052, Australia.

**Table S1 Summary of solubilities of biofilms in all the organic solvents and ionic liquids screened.**

|                             | <i>P. aeruginosa</i><br>RSCV | GAO-enriched granules | DPAO granules | Glycogen |
|-----------------------------|------------------------------|-----------------------|---------------|----------|
| <b>Ionic liquids</b>        |                              |                       |               |          |
| 1-ethyl-3-methylimidazolium | High                         | High                  | High          | High     |

|                                                                           |          |          |          |                |
|---------------------------------------------------------------------------|----------|----------|----------|----------------|
| acetate (EMIM-Ac)                                                         |          |          |          |                |
| 1-ethyl-3-methylimidazolium diethyl phosphate (EMIM-DEP)                  | High     | High     | High     | High           |
| 1-butyl-3-methylimidazolium chloride (BMIM-Cl)                            | High     | High     | High     | High           |
| 1,3-dimethylimidazolium methylsulfate                                     | Very Low | Very Low | Very Low | Not considered |
| 1-Butyl-3-methylimidazolium bis(trifluoromethylsulfonyl)imide             | Very Low | Very Low | Very Low | Not considered |
| Trihexyl(tetradecyl)phosphonium bis(trifluoromethylsulfonyl)imide         | Very Low | Very Low | Very Low | Not considered |
| 1-Butyl-3-methylimidazolium tetrafluoroborate                             | Very Low | Very Low | Very Low | Not considered |
| N-Butyl-1-methylpyrrolidinium dicyanamide                                 | Very Low | Very Low | Very Low | Not considered |
| Trihexyl(tetradecyl)phosphonium tris(pentafluoroethyl) trifluorophosphate | Very Low | Very Low | Very Low | Not considered |
| 1-Butyl-3-methylimidazolium tris(pentafluoroethyl)trifluorophosphate      | Very Low | Very Low | Very Low | Not considered |
| 1-Butyl-1-methyl-pyrrolidinium tetracyanoborate                           | Very Low | Very Low | Very Low | Not considered |
| <b>Organics</b>                                                           |          |          |          |                |
| Ethanolamine                                                              | Medium   | Medium   | Medium   | High           |
| Dimethyl sulfoxide                                                        | Very Low | Very Low | Very Low | High           |
| Dimethylformamide                                                         | Very Low | Very Low | Very Low | High           |

|                     |          |          |          |          |
|---------------------|----------|----------|----------|----------|
| Dimethylacetamide   | Medium   | Medium   | Low      | High     |
| Diethylene glycol   | Very Low | Very Low | Very Low | High     |
| 2-pyrrolidone       | Very Low | Very Low | Very Low | High     |
| Allyl alcohol       | Very Low | Very Low | Very Low | Very Low |
| Propylene Carbonate | Very Low | Very Low | Very Low | Very Low |
| 1-butanol           | Very Low | Very Low | Very Low | Very Low |
| 2-butanol           | Very Low | Very Low | Very Low | Very Low |
| 2 propanol          | Very Low | Very Low | Very Low | Very Low |
| <b>Water</b>        | Very Low | Very Low | Very Low | High     |

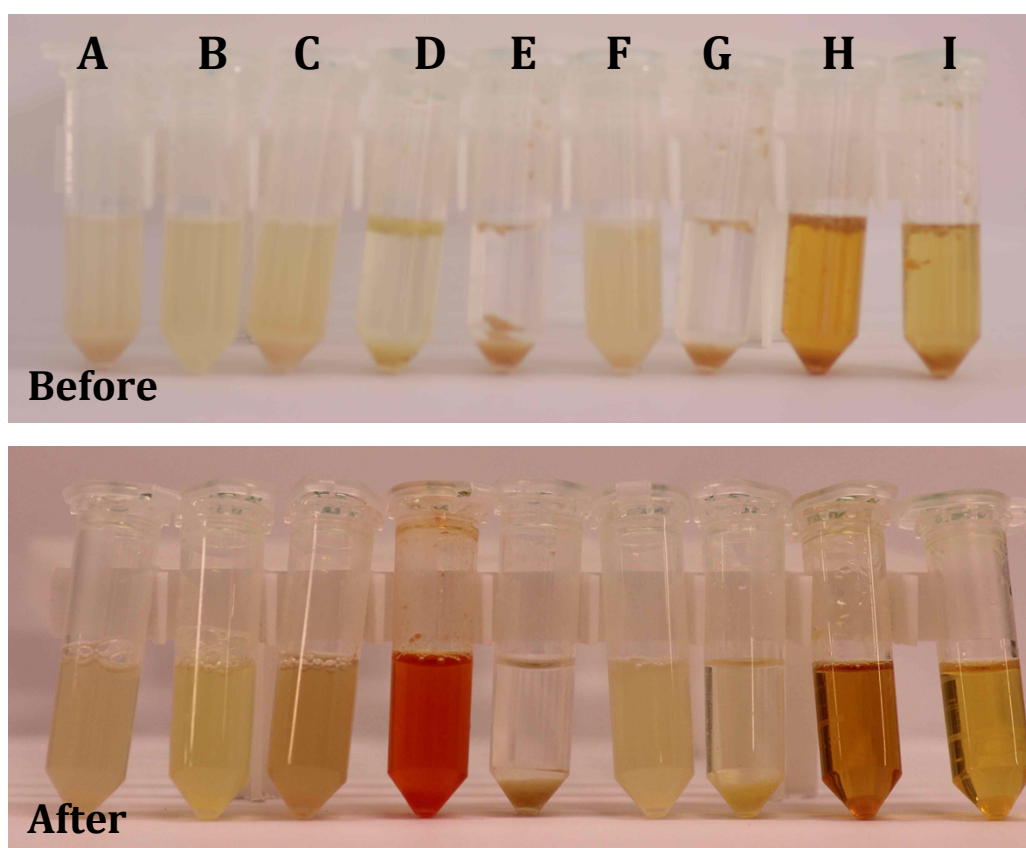

**Fig. S1** Representative images of *Pseudomonas aeruginosa* RSCV pellicle biofilms in phosphate buffer solution (PBS) pH 7 (10 mg dry solid/mL solvent) (A) PBS with NaOH to pH 10.0 (B), in Luria Bertani (LB) broth (C), ethanolamine (D), 1-butanol (E), ammonium bicarbonate buffer solution (50 mM), NaOH to pH 10.3 (F), N,N-dimethylacetamide (DMAc) (G), 1-ethyl-3-methylimidazolium acetate (EMIM-Ac) (H) and 40:60 EMIM-Ac:DMAc (I) before and after solubilisation for 3 days at 60 °C.

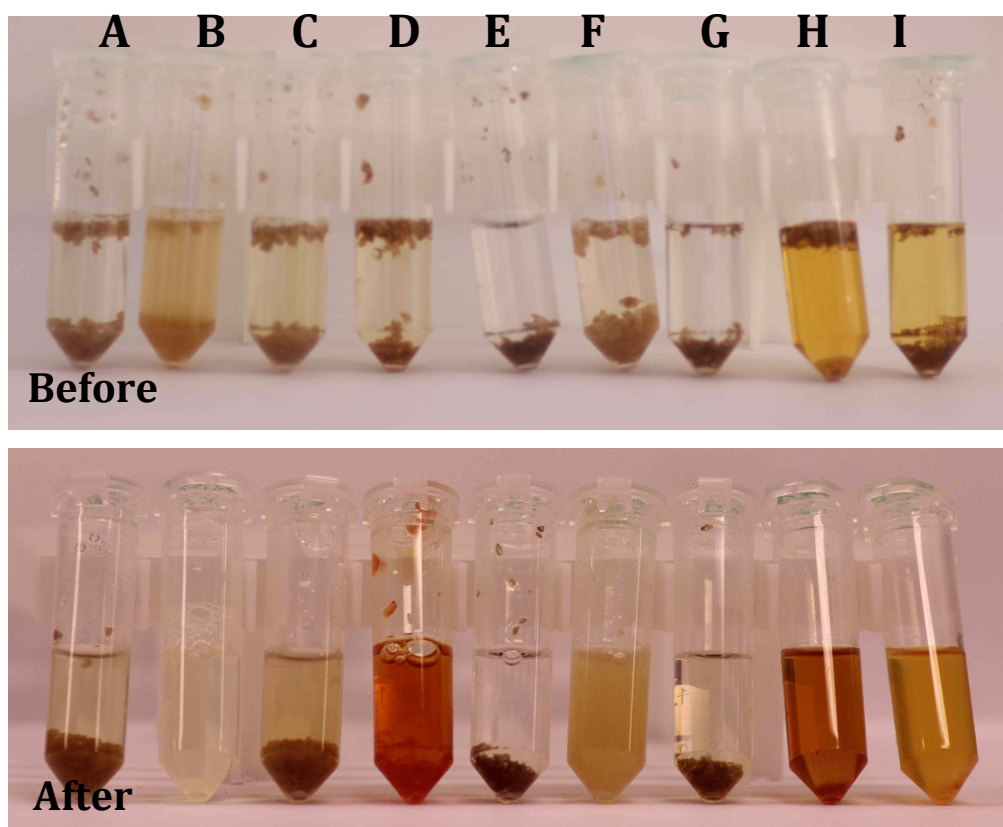

**Fig. S2 Representative images of Glycogen Accumulating Organism-enriched granular biofilms in phosphate buffer solution (PBS) pH 7 (10 mg dry solid/mL solvent) (A) PBS with NaOH to pH 10.0 (B), in Luria Bertani (LB) broth (C), ethanolamine (D), 1-butanol (E), ammonium bicarbonate buffer solution (50 mM), NaOH to pH 10.3 (F), N,N-dimethylacetamide (DMAc) (G), 1-ethyl-3-methylimidazolium acetate (EMIM-Ac) (H) and 40:60 EMIM-Ac:DMAc (I) before and after solubilisation for 3 days at 60 °C.**

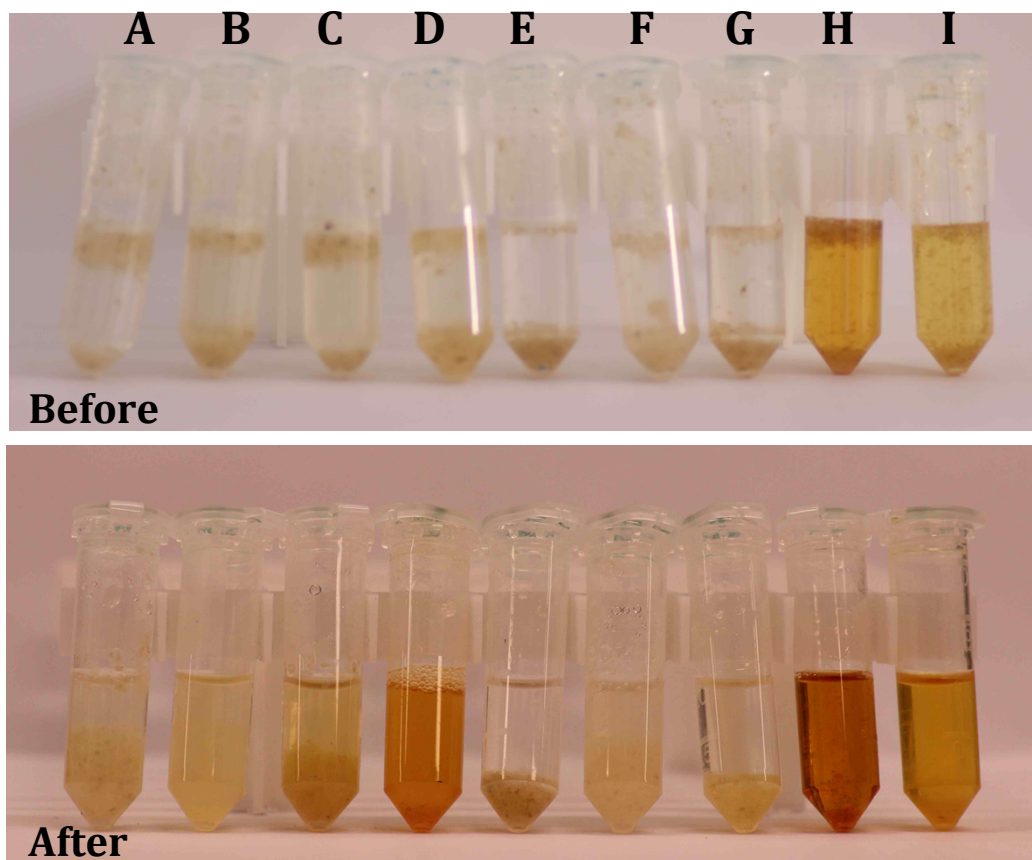

**Fig. S3 Representative images of Denitrifying Polyphosphate Accumulating Organism-enriched granular biofilm in phosphate buffer solution (PBS) pH 7 (10 mg dry solid/mL solvent) (A) PBS with NaOH to pH 10.0 (B), in Luria Bertani (LB) broth (C), ethanolamine (D), 1-butanol (E), ammonium bicarbonate buffer solution (50 mM), NaOH to pH 10.3 (F), N,N-dimethylacetamide (DMAc) (G), 1-ethyl-3-methylimidazolium acetate (EMIM-Ac) (H) and 40:60 EMIM-Ac:DMAc (I) before and after solubilisation for 3 days at 60 °C.**

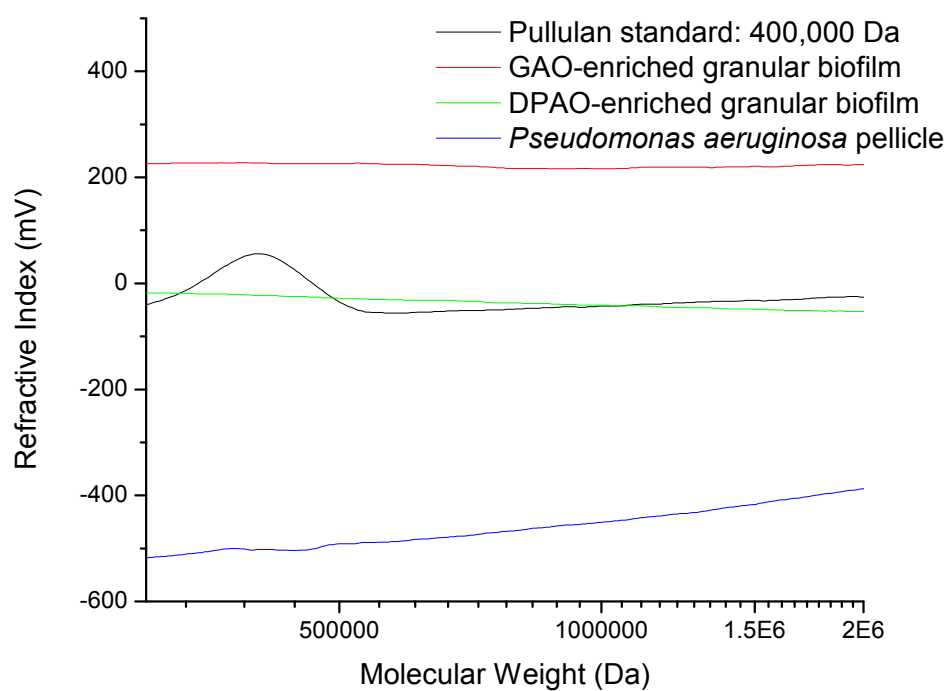

**Fig. S4 MW distributions of all three biofilms in N,N-dimethylacetamide only (i.e. with no ionic liquid present) showing the complete absence of peaks corresponding to high MW compounds (i.e.  $> 2 \times 10^5$  Da).**
